# Supplementary material
Source: publisher site journal article supplement (https://www.kjim.org/upload/media/kjim-2023-266-Supplementary-Table-1.pdf)
Supplement: Supplementary file 1 [file kjim-2023-266-Supplementary-Table-1.pdf]

**Supplementary Table 1. Results of high-resolution esophageal manometry (n = 19)**

| Manometric finding              | Value           |
|---------------------------------|-----------------|
| UES basal pressure (mmHg)       | 82.7 ± 34.3     |
| DCI (mmHg-s-cm)                 | 1,235.1 ± 937.8 |
| IRP (mmHg)                      | 18.5 ± 8.2      |
| Manometry results <sup>a)</sup> |                 |
| Achalasia                       | 3 (15.8)        |
| EGJOO                           | 4 (21.1)        |
| Ineffective esophageal motility | 2 (10.5)        |
| Fragmented peristalsis          | 1 (5.3)         |
| Normal esophageal motility      | 9 (47.4)        |

Values are presented as mean ± standard deviation or number (%).

DCI, distal contractile integral; IRP, integrated relaxation pressure; EGJOO, esophagogastric junction outflow obstruction; UES, upper esophageal sphincter.

<sup>a)</sup>The manometry results were interpreted according to the Chicago Classification version 3.0.
